# Supplementary material for: Transcriptomic Analysis Reveals Abnormal Expression of Prion Disease Gene Pathway in Brains from Patients with Autism Spectrum Disorders
Source: Brain Sci. 2020 Mar 29;10(4):200. doi: 10.3390/brainsci10040200 (PMC7226514; doi:10.3390/brainsci10040200)
Supplement: Supplementary file 1 [file brainsci-10-00200-s001.xlsx]

## Sheet: Prion diseases pathway
ID	Gene Name	Species	BBID	BIOCARTA	COG_ONTOLOGY	GOTERM_BP_DIRECT	GOTERM_CC_DIRECT	GOTERM_MF_DIRECT	INTERPRO	KEGG_PATHWAY	OMIM_DISEASE	PIR_SUPERFAMILY	SMART	UP_KEYWORDS	UP_SEQ_FEATURE
BAX	BCL2 associated X, apoptosis regulator(BAX)	Homo sapiens	127.Mito-stress,152.altered_synaptic_signalling-neurodegenerative_disorders,46.P13K_PTEN,	h_badPathway:Regulation of BAD phosphorylation,h_ceramidePathway:Ceramide Signaling Pathway,h_chemicalPathway:Apoptotic Signaling in Response to DNA Damage,h_mitochondriaPathway:Role of Mitochondria in Apoptotic Signaling,h_p53hypoxiaPathway:Hypoxia and p53 in the Cardiovascular system,h_p53Pathway:p53 Signaling Pathway,		GO:0001541~ovarian follicle development,GO:0001764~neuron migration,GO:0001777~T cell homeostatic proliferation,GO:0001782~B cell homeostasis,GO:0001783~B cell apoptotic process,GO:0001822~kidney development,GO:0001836~release of cytochrome c from mitochondria,GO:0001844~protein insertion into mitochondrial membrane involved in apoptotic signaling pathway,GO:0001974~blood vessel remodeling,GO:000…	GO:0005634~nucleus,GO:0005635~nuclear envelope,GO:0005737~cytoplasm,GO:0005739~mitochondrion,GO:0005741~mitochondrial outer membrane,GO:0005757~mitochondrial permeability transition pore complex,GO:0005783~endoplasmic reticulum,GO:0005789~endoplasmic reticulum membrane,GO:0005829~cytosol,GO:0016020~membrane,GO:0016021~integral component of membrane,GO:0046930~pore complex,GO:0070062~extracellular…	GO:0005515~protein binding,GO:0008289~lipid binding,GO:0015267~channel activity,GO:0030544~Hsp70 protein binding,GO:0042802~identical protein binding,GO:0042803~protein homodimerization activity,GO:0046982~protein heterodimerization activity,GO:0051087~chaperone binding,GO:0051434~BH3 domain binding,	IPR002475:Bcl2-like,IPR020717:Apoptosis regulator, Bcl-2, BH1 motif, conserved site,IPR020726:Apoptosis regulator, Bcl-2, BH2 motif, conserved site,IPR020728:Apoptosis regulator, Bcl-2, BH3 motif, conserved site,IPR026298:Blc2 family,IPR026304:Apoptosis regulator BAX,	hsa04071:Sphingolipid signaling pathway,hsa04115:p53 signaling pathway,hsa04141:Protein processing in endoplasmic reticulum,hsa04210:Apoptosis,hsa04722:Neurotrophin signaling pathway,hsa04932:Non-alcoholic fatty liver disease (NAFLD),hsa05014:Amyotrophic lateral sclerosis (ALS),hsa05016:Huntington's disease,hsa05020:Prion diseases,hsa05152:Tuberculosis,hsa05161:Hepatitis B,hsa05166:HTLV-I infecti…	114500~Colorectal cancer, somatic,613065~T-cell acute lymphoblastic leukemia, somatic,			3D-structure,Acetylation,Alternative splicing,Apoptosis,Complete proteome,Cytoplasm,Host-virus interaction,Membrane,Mitochondrion,Polymorphism,Proteomics identification,Reference proteome,Transmembrane,Transmembrane helix,Tumor suppressor,	chain:Apoptosis regulator BAX,helix,modified residue,mutagenesis site,sequence variant,short sequence motif:BH1,short sequence motif:BH2,short sequence motif:BH3,splice variant,strand,transmembrane region,turn,
C1QA	complement C1q A chain(C1QA)	Homo sapiens		h_classicPathway:Classical Complement Pathway,h_compPathway:Complement Pathway,		GO:0006508~proteolysis,GO:0006956~complement activation,GO:0006958~complement activation, classical pathway,GO:0007267~cell-cell signaling,GO:0010039~response to iron ion,GO:0045087~innate immune response,	GO:0005576~extracellular region,GO:0005581~collagen trimer,GO:0005602~complement component C1 complex,GO:0070062~extracellular exosome,	GO:0004252~serine-type endopeptidase activity,GO:0005515~protein binding,	IPR001073:Complement C1q protein,IPR008160:Collagen triple helix repeat,IPR008983:Tumour necrosis factor-like domain,	hsa04610:Complement and coagulation cascades,hsa05020:Prion diseases,hsa05133:Pertussis,hsa05142:Chagas disease (American trypanosomiasis),hsa05150:Staphylococcus aureus infection,hsa05322:Systemic lupus erythematosus,	613652~C1q deficiency,		SM00110:C1Q,	3D-structure,Collagen,Complement pathway,Complete proteome,Direct protein sequencing,Disulfide bond,Glycoprotein,Hydroxylation,Immunity,Innate immunity,Polymorphism,Proteomics identification,Reference proteome,Repeat,Secreted,Signal,	chain:Complement C1q subcomponent subunit A,disulfide bond,domain:C1q,domain:Collagen-like,glycosylation site:N-linked (GlcNAc...),glycosylation site:O-linked (Gal...),modified residue,sequence conflict,sequence variant,signal peptide,strand,turn,
C1QB	complement C1q B chain(C1QB)	Homo sapiens		h_classicPathway:Classical Complement Pathway,h_compPathway:Complement Pathway,		GO:0006508~proteolysis,GO:0006956~complement activation,GO:0006958~complement activation, classical pathway,GO:0045087~innate immune response,GO:0048839~inner ear development,	GO:0005576~extracellular region,GO:0005581~collagen trimer,GO:0005602~complement component C1 complex,GO:0070062~extracellular exosome,GO:0072562~blood microparticle,	GO:0004252~serine-type endopeptidase activity,GO:0005515~protein binding,GO:0042803~protein homodimerization activity,	IPR001073:Complement C1q protein,IPR008160:Collagen triple helix repeat,IPR008983:Tumour necrosis factor-like domain,	hsa04610:Complement and coagulation cascades,hsa05020:Prion diseases,hsa05133:Pertussis,hsa05142:Chagas disease (American trypanosomiasis),hsa05150:Staphylococcus aureus infection,hsa05322:Systemic lupus erythematosus,	613652~C1q deficiency,		SM00110:C1Q,	3D-structure,Collagen,Complement pathway,Complete proteome,Direct protein sequencing,Disease mutation,Disulfide bond,Glycoprotein,Hydroxylation,Immunity,Innate immunity,Polymorphism,Proteomics identification,Pyrrolidone carboxylic acid,Reference proteome,Repeat,Secreted,Signal,	chain:Complement C1q subcomponent subunit B,disulfide bond,domain:C1q,domain:Collagen-like,glycosylation site:O-linked (Gal...),modified residue,sequence conflict,sequence variant,signal peptide,strand,turn,
C1QC	complement C1q C chain(C1QC)	Homo sapiens		h_classicPathway:Classical Complement Pathway,h_compPathway:Complement Pathway,		GO:0006508~proteolysis,GO:0006955~immune response,GO:0006956~complement activation,GO:0006958~complement activation, classical pathway,GO:0030853~negative regulation of granulocyte differentiation,GO:0045087~innate immune response,GO:0045650~negative regulation of macrophage differentiation,	GO:0005576~extracellular region,GO:0005581~collagen trimer,GO:0005615~extracellular space,GO:0070062~extracellular exosome,GO:0072562~blood microparticle,	GO:0004252~serine-type endopeptidase activity,	IPR001073:Complement C1q protein,IPR008160:Collagen triple helix repeat,IPR008983:Tumour necrosis factor-like domain,	hsa04610:Complement and coagulation cascades,hsa05020:Prion diseases,hsa05133:Pertussis,hsa05142:Chagas disease (American trypanosomiasis),hsa05150:Staphylococcus aureus infection,hsa05322:Systemic lupus erythematosus,	613652~C1q deficiency,		SM00110:C1Q,	3D-structure,Collagen,Complement pathway,Complete proteome,Direct protein sequencing,Disease mutation,Disulfide bond,Glycoprotein,Hydroxylation,Immunity,Innate immunity,Reference proteome,Repeat,Secreted,Signal,	chain:Complement C1q subcomponent subunit C,disulfide bond,domain:C1q,domain:Collagen-like,glycosylation site:O-linked (Gal...),modified residue,sequence conflict,sequence variant,signal peptide,strand,turn,
C5	complement C5(C5)	Homo sapiens		h_alternativePathway:Alternative Complement Pathway,h_classicPathway:Classical Complement Pathway,h_compPathway:Complement Pathway,h_granulocytesPathway:Adhesion and Diapedesis of Granulocytes,h_LairPathway:Cells and Molecules involved in local acute inflammatory response,h_lectinPathway:Lectin Induced Complement Pathway,		GO:0000187~activation of MAPK activity,GO:0001701~in utero embryonic development,GO:0006935~chemotaxis,GO:0006950~response to stress,GO:0006954~inflammatory response,GO:0006956~complement activation,GO:0006957~complement activation, alternative pathway,GO:0006958~complement activation, classical pathway,GO:0007166~cell surface receptor signaling pathway,GO:0007186~G-protein coupled receptor signa…	GO:0005576~extracellular region,GO:0005579~membrane attack complex,GO:0005615~extracellular space,GO:0070062~extracellular exosome,	GO:0004866~endopeptidase inhibitor activity,GO:0005102~receptor binding,GO:0005515~protein binding,GO:0008009~chemokine activity,	IPR000020:Anaphylatoxin/fibulin,IPR001134:Netrin domain,IPR001599:Alpha-2-macroglobulin,IPR001840:Complement C3a/C4a/C5a anaphylatoxin,IPR002890:Alpha-2-macroglobulin, N-terminal,IPR008930:Terpenoid cyclases/protein prenyltransferase alpha-alpha toroid,IPR008993:Tissue inhibitor of metalloproteinases-like, OB-fold,IPR009048:Alpha-macroglobulin, receptor-binding,IPR011625:Alpha-2-macroglobulin, N-…	hsa04610:Complement and coagulation cascades,hsa05020:Prion diseases,hsa05133:Pertussis,hsa05150:Staphylococcus aureus infection,hsa05168:Herpes simplex infection,hsa05322:Systemic lupus erythematosus,	609536~C5 deficiency,615749~Eculizumab, poor response to,		SM00104:ANATO,SM00643:C345C,SM01359:SM01359,SM01360:SM01360,SM01361:SM01361,	3D-structure,Cleavage on pair of basic residues,Complement alternate pathway,Complement pathway,Complete proteome,Cytolysis,Direct protein sequencing,Disulfide bond,Glycoprotein,Immunity,Inflammatory response,Innate immunity,Membrane attack complex,Polymorphism,Reference proteome,Secreted,Signal,	chain:C5a anaphylatoxin,chain:Complement C5 alpha chain,chain:Complement C5 alpha' chain,chain:Complement C5 beta chain,disulfide bond,domain:Anaphylatoxin-like,domain:NTR,glycosylation site:N-linked (GlcNAc...),helix,sequence variant,signal peptide,strand,turn,
C6	complement C6(C6)	Homo sapiens		h_alternativePathway:Alternative Complement Pathway,h_classicPathway:Classical Complement Pathway,h_compPathway:Complement Pathway,h_LairPathway:Cells and Molecules involved in local acute inflammatory response,h_lectinPathway:Lectin Induced Complement Pathway,		GO:0001701~in utero embryonic development,GO:0001970~positive regulation of activation of membrane attack complex,GO:0006956~complement activation,GO:0006958~complement activation, classical pathway,GO:0019835~cytolysis,GO:0030449~regulation of complement activation,GO:0045087~innate immune response,GO:0045766~positive regulation of angiogenesis,	GO:0005576~extracellular region,GO:0005579~membrane attack complex,GO:0070062~extracellular exosome,	GO:0005515~protein binding,	IPR000436:Sushi/SCR/CCP,IPR000884:Thrombospondin, type 1 repeat,IPR001862:Membrane attack complex component/perforin/complement C9,IPR002172:Low-density lipoprotein (LDL) receptor class A repeat,IPR002350:Kazal domain,IPR003884:Factor I / membrane attack complex,IPR020863:Membrane attack complex component/perforin domain, conserved site,IPR020864:Membrane attack complex component/perforin (MACPF)…	hsa04610:Complement and coagulation cascades,hsa05020:Prion diseases,hsa05322:Systemic lupus erythematosus,	612446~C6 deficiency,Combined C6/C7 deficiency~Combined C6/C7 deficiency,		SM00032:CCP,SM00057:FIMAC,SM00192:LDLa,SM00209:TSP1,SM00457:MACPF,	3D-structure,Complement pathway,Complete proteome,Cytolysis,Direct protein sequencing,Disulfide bond,EGF-like domain,Glycoprotein,Immunity,Innate immunity,Membrane attack complex,Polymorphism,Proteomics identification,Reference proteome,Repeat,Secreted,Signal,Sushi,	chain:Complement component C6,disulfide bond,domain:EGF-like,domain:Kazal-like 1,domain:Kazal-like 2,domain:LDL-receptor class A,domain:MACPF,domain:Sushi 1,domain:Sushi 2,domain:TSP type-1 1,domain:TSP type-1 2,domain:TSP type-1 3,glycosylation site:C-linked (Man),glycosylation site:C-linked (Man); partial,glycosylation site:N-linked (GlcNAc...),modified residue,region of interest:C5B-binding do…
C7	complement C7(C7)	Homo sapiens		h_alternativePathway:Alternative Complement Pathway,h_classicPathway:Classical Complement Pathway,h_compPathway:Complement Pathway,h_LairPathway:Cells and Molecules involved in local acute inflammatory response,h_lectinPathway:Lectin Induced Complement Pathway,		GO:0006955~immune response,GO:0006956~complement activation,GO:0006957~complement activation, alternative pathway,GO:0006958~complement activation, classical pathway,GO:0019835~cytolysis,GO:0030449~regulation of complement activation,	GO:0005576~extracellular region,GO:0005579~membrane attack complex,GO:0070062~extracellular exosome,		IPR000436:Sushi/SCR/CCP,IPR000884:Thrombospondin, type 1 repeat,IPR001862:Membrane attack complex component/perforin/complement C9,IPR002172:Low-density lipoprotein (LDL) receptor class A repeat,IPR003884:Factor I / membrane attack complex,IPR020863:Membrane attack complex component/perforin domain, conserved site,IPR020864:Membrane attack complex component/perforin (MACPF) domain,IPR023415:Low-d…	hsa04610:Complement and coagulation cascades,hsa05020:Prion diseases,hsa05322:Systemic lupus erythematosus,	610102~C7 deficiency,		SM00032:CCP,SM00057:FIMAC,SM00192:LDLa,SM00209:TSP1,SM00457:MACPF,	3D-structure,Complement alternate pathway,Complement pathway,Complete proteome,Cytolysis,Direct protein sequencing,Disease mutation,Disulfide bond,EGF-like domain,Glycoprotein,Immunity,Innate immunity,Membrane attack complex,Polymorphism,Reference proteome,Repeat,Secreted,Signal,Sushi,	chain:Complement component C7,disulfide bond,domain:EGF-like,domain:LDL-receptor class A,domain:MACPF,domain:Sushi 1,domain:Sushi 2,domain:TSP type-1 1,domain:TSP type-1 2,glycosylation site:C-linked (Man),glycosylation site:C-linked (Man); partial,glycosylation site:N-linked (GlcNAc...),helix,region of interest:Complement control factor I module 1,region of interest:Complement control factor I m…
C8A	complement C8 alpha chain(C8A)	Homo sapiens		h_alternativePathway:Alternative Complement Pathway,h_classicPathway:Classical Complement Pathway,h_compPathway:Complement Pathway,h_lectinPathway:Lectin Induced Complement Pathway,		GO:0006955~immune response,GO:0006956~complement activation,GO:0006957~complement activation, alternative pathway,GO:0006958~complement activation, classical pathway,GO:0019835~cytolysis,GO:0030449~regulation of complement activation,	GO:0005576~extracellular region,GO:0005579~membrane attack complex,GO:0005615~extracellular space,GO:0016020~membrane,GO:0070062~extracellular exosome,GO:0072562~blood microparticle,	GO:0001848~complement binding,GO:0032403~protein complex binding,	IPR000884:Thrombospondin, type 1 repeat,IPR001862:Membrane attack complex component/perforin/complement C9,IPR002172:Low-density lipoprotein (LDL) receptor class A repeat,IPR009030:Insulin-like growth factor binding protein, N-terminal,IPR020863:Membrane attack complex component/perforin domain, conserved site,IPR020864:Membrane attack complex component/perforin (MACPF) domain,IPR023415:Low-densi…	hsa04610:Complement and coagulation cascades,hsa05020:Prion diseases,hsa05146:Amoebiasis,hsa05322:Systemic lupus erythematosus,	613790~C8 deficiency, type I,		SM00192:LDLa,SM00209:TSP1,SM00457:MACPF,	3D-structure,Cell membrane,Cleavage on pair of basic residues,Complement alternate pathway,Complement pathway,Complete proteome,Cytolysis,Direct protein sequencing,Disulfide bond,EGF-like domain,Glycoprotein,Immunity,Innate immunity,Membrane,Membrane attack complex,Polymorphism,Reference proteome,Repeat,Secreted,Signal,Transmembrane,Transmembrane beta strand,	chain:Complement component C8 alpha chain,disulfide bond,domain:EGF-like,domain:LDL-receptor class A,domain:MACPF,domain:TSP type-1 1,domain:TSP type-1 2,glycosylation site:C-linked (Man),glycosylation site:N-linked (GlcNAc...),helix,sequence conflict,sequence variant,signal peptide,site:Not glycosylated,strand,turn,
C8B	complement C8 beta chain(C8B)	Homo sapiens				GO:0006955~immune response,GO:0006956~complement activation,GO:0006957~complement activation, alternative pathway,GO:0006958~complement activation, classical pathway,GO:0019835~cytolysis,GO:0030449~regulation of complement activation,	GO:0005576~extracellular region,GO:0005579~membrane attack complex,GO:0005615~extracellular space,GO:0016020~membrane,GO:0070062~extracellular exosome,GO:1903561~extracellular vesicle,	GO:0032403~protein complex binding,	IPR000884:Thrombospondin, type 1 repeat,IPR001862:Membrane attack complex component/perforin/complement C9,IPR002172:Low-density lipoprotein (LDL) receptor class A repeat,IPR020863:Membrane attack complex component/perforin domain, conserved site,IPR020864:Membrane attack complex component/perforin (MACPF) domain,IPR023415:Low-density lipoprotein (LDL) receptor class A, conserved site,	hsa04610:Complement and coagulation cascades,hsa05020:Prion diseases,hsa05146:Amoebiasis,hsa05322:Systemic lupus erythematosus,	613789~C8 deficiency, type II,		SM00192:LDLa,SM00209:TSP1,SM00457:MACPF,	3D-structure,Complement alternate pathway,Complement pathway,Complete proteome,Cytolysis,Direct protein sequencing,Disulfide bond,EGF-like domain,Glycoprotein,Immunity,Innate immunity,Membrane attack complex,Phosphoprotein,Polymorphism,Proteomics identification,Reference proteome,Repeat,Secreted,Signal,	chain:Complement component C8 beta chain,disulfide bond,domain:EGF-like,domain:LDL-receptor class A,domain:MACPF,domain:TSP type-1 1,domain:TSP type-1 2,glycosylation site:C-linked (Man),glycosylation site:N-linked (GlcNAc...),modified residue,sequence variant,signal peptide,
C8G	complement C8 gamma chain(C8G)	Homo sapiens				GO:0006957~complement activation, alternative pathway,GO:0006958~complement activation, classical pathway,GO:0019835~cytolysis,GO:0030449~regulation of complement activation,	GO:0005576~extracellular region,GO:0005579~membrane attack complex,GO:0070062~extracellular exosome,GO:0072562~blood microparticle,	GO:0001848~complement binding,GO:0019841~retinol binding,GO:0032403~protein complex binding,	IPR000566:Lipocalin/cytosolic fatty-acid binding protein domain,IPR002345:Lipocalin,IPR002968:Alpha-1-microglobulin,IPR011038:Calycin-like,IPR012674:Calycin,IPR022272:Lipocalin conserved site,	hsa04610:Complement and coagulation cascades,hsa05020:Prion diseases,hsa05146:Amoebiasis,hsa05322:Systemic lupus erythematosus,				3D-structure,Complement alternate pathway,Complement pathway,Complete proteome,Cytolysis,Direct protein sequencing,Disulfide bond,Immunity,Innate immunity,Membrane attack complex,Polymorphism,Proteomics identification,Pyrrolidone carboxylic acid,Reference proteome,Retinol-binding,Secreted,Signal,	chain:Complement component C8 gamma chain,disulfide bond,helix,modified residue,sequence variant,signal peptide,strand,
C9	complement C9(C9)	Homo sapiens		h_alternativePathway:Alternative Complement Pathway,h_classicPathway:Classical Complement Pathway,h_compPathway:Complement Pathway,h_lectinPathway:Lectin Induced Complement Pathway,		GO:0006955~immune response,GO:0006957~complement activation, alternative pathway,GO:0006958~complement activation, classical pathway,GO:0019836~hemolysis by symbiont of host erythrocytes,GO:0030449~regulation of complement activation,	GO:0005576~extracellular region,GO:0005579~membrane attack complex,GO:0005737~cytoplasm,GO:0005886~plasma membrane,GO:0005887~integral component of plasma membrane,GO:0016021~integral component of membrane,GO:0070062~extracellular exosome,GO:0072562~blood microparticle,		IPR000884:Thrombospondin, type 1 repeat,IPR001862:Membrane attack complex component/perforin/complement C9,IPR002172:Low-density lipoprotein (LDL) receptor class A repeat,IPR009030:Insulin-like growth factor binding protein, N-terminal,IPR020863:Membrane attack complex component/perforin domain, conserved site,IPR020864:Membrane attack complex component/perforin (MACPF) domain,IPR023415:Low-densi…	hsa04610:Complement and coagulation cascades,hsa05020:Prion diseases,hsa05146:Amoebiasis,hsa05322:Systemic lupus erythematosus,	613825~C9 deficiency,615591~Macular degeneration, age-related, 15, susceptibility to,		SM00192:LDLa,SM00209:TSP1,SM00457:MACPF,	3D-structure,Age-related macular degeneration,Cell membrane,Complement alternate pathway,Complement pathway,Complete proteome,Cytolysis,Direct protein sequencing,Disease mutation,Disulfide bond,EGF-like domain,Glycoprotein,Immunity,Innate immunity,Membrane,Membrane attack complex,Phosphoprotein,Polymorphism,Reference proteome,Secreted,Signal,Transmembrane,Transmembrane beta strand,Transmembrane h…	chain:complement component 9,chain:Complement component C9,chain:Complement component C9a,chain:Complement component C9b,disulfide bond,domain:EGF-like,domain:LDL-receptor class A,domain:MACPF,domain:TSP type-1,glycosylation site:C-linked (Man),glycosylation site:C-linked (Man); partial,glycosylation site:N-linked (GlcNAc...),modified residue,sequence conflict,sequence variant,signal peptide,site…
CASP12	caspase 12 (gene/pseudogene)(CASP12)	Homo sapiens				GO:0030968~endoplasmic reticulum unfolded protein response,GO:0042981~regulation of apoptotic process,GO:0050727~regulation of inflammatory response,GO:0070059~intrinsic apoptotic signaling pathway in response to endoplasmic reticulum stress,GO:0097264~self proteolysis,	GO:0005783~endoplasmic reticulum,GO:0072557~IPAF inflammasome complex,GO:0072559~NLRP3 inflammasome complex,GO:0097169~AIM2 inflammasome complex,	GO:0004197~cysteine-type endopeptidase activity,GO:0097153~cysteine-type endopeptidase activity involved in apoptotic process,	IPR001309:Peptidase C14, ICE, catalytic subunit p20,IPR001315:Caspase Recruitment,IPR002138:Peptidase C14, caspase non-catalytic subunit p10,IPR011029:Death-like domain,IPR015917:Peptidase C14, caspase precursor p45, core,	hsa04141:Protein processing in endoplasmic reticulum,hsa04210:Apoptosis,hsa05010:Alzheimer's disease,hsa05014:Amyotrophic lateral sclerosis (ALS),hsa05020:Prion diseases,hsa05161:Hepatitis B,	Sepsis, susceptibility to~Sepsis, susceptibility to,		SM00115:CASc,	Alternative splicing,Complete proteome,Phosphoprotein,Reference proteome,
CCL5	C-C motif chemokine ligand 5(CCL5)	Homo sapiens	109.Chemokine_families,18.Cytokine_astocytes,22.Cytokine-chemokine_CNS,33.GProt-coupled_Rec_T_Cell_med_Inflamm,34.Chemokines_in_EAE,	h_eosinophilsPathway:The Role of Eosinophils in the Chemokine Network of Allergy,		GO:0000165~MAPK cascade,GO:0002407~dendritic cell chemotaxis,GO:0002548~monocyte chemotaxis,GO:0002676~regulation of chronic inflammatory response,GO:0006816~calcium ion transport,GO:0006874~cellular calcium ion homeostasis,GO:0006887~exocytosis,GO:0006935~chemotaxis,GO:0006954~inflammatory response,GO:0006955~immune response,GO:0007159~leukocyte cell-cell adhesion,GO:0007186~G-protein coupled re…	GO:0005576~extracellular region,GO:0005615~extracellular space,GO:0005737~cytoplasm,	GO:0004435~phosphatidylinositol phospholipase C activity,GO:0004672~protein kinase activity,GO:0005515~protein binding,GO:0008009~chemokine activity,GO:0016004~phospholipase activator activity,GO:0030298~receptor signaling protein tyrosine kinase activator activity,GO:0031726~CCR1 chemokine receptor binding,GO:0031729~CCR4 chemokine receptor binding,GO:0031730~CCR5 chemokine receptor binding,GO:0…	IPR000827:CC chemokine, conserved site,IPR001811:Chemokine interleukin-8-like domain,	hsa04060:Cytokine-cytokine receptor interaction,hsa04062:Chemokine signaling pathway,hsa04620:Toll-like receptor signaling pathway,hsa04621:NOD-like receptor signaling pathway,hsa04623:Cytosolic DNA-sensing pathway,hsa04668:TNF signaling pathway,hsa05020:Prion diseases,hsa05120:Epithelial cell signaling in Helicobacter pylori infection,hsa05142:Chagas disease (American trypanosomiasis),hsa05164:I…	HIV-1 disease, delayed progression of~HIV-1 disease, delayed progression of,HIV-1 disease, rapid progression of~HIV-1 disease, rapid progression of,		SM00199:SCY,	3D-structure,Chemotaxis,Complete proteome,Cytokine,Direct protein sequencing,Disulfide bond,Glycoprotein,Inflammatory response,Oxidation,Polymorphism,Proteomics identification,Reference proteome,Secreted,Signal,	chain:C-C motif chemokine 5,chain:RANTES(3-68),chain:RANTES(4-68),disulfide bond,glycosylation site:O-linked (GalNAc...); partial,helix,sequence conflict,sequence variant,signal peptide,site:Cleavage; by DPP4,site:Susceptible to oxidation,strand,
EGR1	early growth response 1(EGR1)	Homo sapiens	114.Genomic_reformatting_Brain_Ischemia,	h_cdk5Pathway:Phosphorylation of MEK1 by cdk5/p35 down regulates the MAP kinase pathway,	Transcription / Cell division and chromosome partitioning,	GO:0000122~negative regulation of transcription from RNA polymerase II promoter,GO:0001666~response to hypoxia,GO:0002931~response to ischemia,GO:0006366~transcription from RNA polymerase II promoter,GO:0009749~response to glucose,GO:0030217~T cell differentiation,GO:0030509~BMP signaling pathway,GO:0032868~response to insulin,GO:0033233~regulation of protein sumoylation,GO:0035914~skeletal muscl…	GO:0005634~nucleus,GO:0005654~nucleoplasm,GO:0005737~cytoplasm,	GO:0000976~transcription regulatory region sequence-specific DNA binding,GO:0000977~RNA polymerase II regulatory region sequence-specific DNA binding,GO:0001077~transcriptional activator activity, RNA polymerase II core promoter proximal region sequence-specific binding,GO:0003677~DNA binding,GO:0003700~transcription factor activity, sequence-specific DNA binding,GO:0005515~protein binding,GO:000…	IPR007087:Zinc finger, C2H2,IPR013087:Zinc finger C2H2-type/integrase DNA-binding domain,IPR015880:Zinc finger, C2H2-like,IPR021839:Protein of unknown function DUF3432,IPR021849:Protein of unknown function DUF3446,	hsa05020:Prion diseases,hsa05166:HTLV-I infection,			SM00355:ZnF_C2H2,	3D-structure,Activator,Complete proteome,Cytoplasm,DNA-binding,Metal-binding,Nucleus,Polymorphism,Reference proteome,Repeat,Transcription,Transcription regulation,Zinc,Zinc-finger,	chain:Early growth response protein 1,compositionally biased region:Gly/Ser-rich,sequence variant,zinc finger region:C2H2-type 1,zinc finger region:C2H2-type 2,zinc finger region:C2H2-type 3,
ELK1	ELK1, ETS transcription factor(ELK1)	Homo sapiens	67.Ikaros_and_signaling_inhibitors,	h_at1rPathway:Angiotensin II mediated activation of JNK Pathway via Pyk2 dependent signaling,h_bcrPathway:BCR Signaling Pathway,h_egfPathway:EGF Signaling Pathway,h_epoPathway:EPO Signaling Pathway,h_erkPathway:Erk1/Erk2 Mapk Signaling pathway,h_fcer1Pathway:Fc Epsilon Receptor I Signaling in Mast Cells,h_fmlpPathway:fMLP induced chemokine gene expression in HMC-1 cells,h_gpcrPathway:Signaling Pa…		GO:0006366~transcription from RNA polymerase II promoter,GO:0009416~response to light stimulus,GO:0030154~cell differentiation,GO:0045893~positive regulation of transcription, DNA-templated,GO:0045944~positive regulation of transcription from RNA polymerase II promoter,GO:0071394~cellular response to testosterone stimulus,GO:0071480~cellular response to gamma radiation,GO:0071774~response to fibr…	GO:0005634~nucleus,GO:0005654~nucleoplasm,GO:0005739~mitochondrion,GO:0030425~dendrite,GO:0043025~neuronal cell body,GO:0043679~axon terminus,	GO:0000978~RNA polymerase II core promoter proximal region sequence-specific DNA binding,GO:0001047~core promoter binding,GO:0001077~transcriptional activator activity, RNA polymerase II core promoter proximal region sequence-specific binding,GO:0001085~RNA polymerase II transcription factor binding,GO:0003682~chromatin binding,GO:0003690~double-stranded DNA binding,GO:0003700~transcription facto…	IPR000418:Ets domain,IPR011991:Winged helix-turn-helix DNA-binding domain,	hsa04010:MAPK signaling pathway,hsa04012:ErbB signaling pathway,hsa04014:Ras signaling pathway,hsa04510:Focal adhesion,hsa04910:Insulin signaling pathway,hsa04912:GnRH signaling pathway,hsa04921:Oxytocin signaling pathway,hsa05020:Prion diseases,hsa05140:Leishmaniasis,hsa05161:Hepatitis B,hsa05166:HTLV-I infection,hsa05205:Proteoglycans in cancer,hsa05213:Endometrial cancer,			SM00413:ETS,	3D-structure,Activator,Alternative splicing,Complete proteome,Direct protein sequencing,DNA-binding,Isopeptide bond,Nucleus,Phosphoprotein,Polymorphism,Reference proteome,Transcription,Transcription regulation,Ubl conjugation,	chain:ETS domain-containing protein Elk-1,cross-link:Glycyl lysine isopeptide (Lys-Gly) (interchain with G-Cter in SUMO),DNA-binding region:ETS,helix,modified residue,mutagenesis site,sequence variant,splice variant,strand,turn,
FYN	FYN proto-oncogene, Src family tyrosine kinase(FYN)	Homo sapiens	67.Ikaros_and_signaling_inhibitors,81.Structure_of_Caps_and_SMACs,	h_biopeptidesPathway:Bioactive Peptide Induced Signaling Pathway,h_ecmPathway:Erk and PI-3 Kinase Are Necessary for Collagen Binding in Corneal Epithelia,h_ephA4Pathway:Eph Kinases and ephrins support platelet aggregation,h_il7Pathway:IL-7 Signal Transduction,h_integrinPathway:Integrin Signaling Pathway,h_reelinPathway:Reelin Signaling Pathway,h_tcraPathway:Lck and Fyn tyrosine kinases in initiat…		GO:0000165~MAPK cascade,GO:0001764~neuron migration,GO:0002223~stimulatory C-type lectin receptor signaling pathway,GO:0002250~adaptive immune response,GO:0006468~protein phosphorylation,GO:0006816~calcium ion transport,GO:0007169~transmembrane receptor protein tyrosine kinase signaling pathway,GO:0007411~axon guidance,GO:0007417~central nervous system development,GO:0007596~blood coagulation,GO:…	GO:0005634~nucleus,GO:0005739~mitochondrion,GO:0005768~endosome,GO:0005829~cytosol,GO:0005884~actin filament,GO:0005886~plasma membrane,GO:0014069~postsynaptic density,GO:0031234~extrinsic component of cytoplasmic side of plasma membrane,GO:0045121~membrane raft,	GO:0001664~G-protein coupled receptor binding,GO:0001948~glycoprotein binding,GO:0004713~protein tyrosine kinase activity,GO:0004715~non-membrane spanning protein tyrosine kinase activity,GO:0005088~Ras guanyl-nucleotide exchange factor activity,GO:0005515~protein binding,GO:0005524~ATP binding,GO:0015631~tubulin binding,GO:0019899~enzyme binding,GO:0042608~T cell receptor binding,GO:0042609~CD4 …	IPR000719:Protein kinase, catalytic domain,IPR000980:SH2 domain,IPR001245:Serine-threonine/tyrosine-protein kinase catalytic domain,IPR001452:Src homology-3 domain,IPR008266:Tyrosine-protein kinase, active site,IPR011009:Protein kinase-like domain,IPR017441:Protein kinase, ATP binding site,IPR020635:Tyrosine-protein kinase, catalytic domain,	hsa04071:Sphingolipid signaling pathway,hsa04360:Axon guidance,hsa04380:Osteoclast differentiation,hsa04510:Focal adhesion,hsa04520:Adherens junction,hsa04611:Platelet activation,hsa04650:Natural killer cell mediated cytotoxicity,hsa04660:T cell receptor signaling pathway,hsa04664:Fc epsilon RI signaling pathway,hsa04725:Cholinergic synapse,hsa05020:Prion diseases,hsa05130:Pathogenic Escherichia …			SM00219:TyrKc,SM00252:SH2,SM00326:SH3,	3D-structure,Adaptive immunity,Alternative splicing,ATP-binding,Cell membrane,Complete proteome,Cytoplasm,Developmental protein,Host-virus interaction,Immunity,Kinase,Lipoprotein,Manganese,Membrane,Metal-binding,Myristate,Nucleotide-binding,Nucleus,Palmitate,Phosphoprotein,Polymorphism,Proteomics identification,Proto-oncogene,Reference proteome,SH2 domain,SH3 domain,Transferase,Tyrosine-protein k…	active site:Proton acceptor,binding site:ATP,chain:Proto-oncogene tyrosine-protein kinase Fyn,domain:Protein kinase,domain:SH2,domain:SH3,helix,lipid moiety-binding region:N-myristoyl glycine,lipid moiety-binding region:S-palmitoyl cysteine,modified residue,nucleotide phosphate-binding region:ATP,sequence conflict,sequence variant,splice variant,strand,turn,
HSPA1A	heat shock protein family A (Hsp70) member 1A(HSPA1A)	Homo sapiens	114.Genomic_reformatting_Brain_Ischemia,	h_p53hypoxiaPathway:Hypoxia and p53 in the Cardiovascular system,h_PparaPathway:Mechanism of Gene Regulation by Peroxisome Proliferators via PPARa(alpha),h_tidPathway:Chaperones modulate interferon Signaling Pathway,		GO:0010628~positive regulation of gene expression,GO:0010941~regulation of cell death,GO:0030512~negative regulation of transforming growth factor beta receptor signaling pathway,GO:0031396~regulation of protein ubiquitination,GO:0031397~negative regulation of protein ubiquitination,GO:0032436~positive regulation of proteasomal ubiquitin-dependent protein catabolic process,GO:0032757~positive reg…	GO:0000151~ubiquitin ligase complex,GO:0005654~nucleoplasm,GO:0005737~cytoplasm,GO:0005739~mitochondrion,GO:0005814~centriole,GO:0005829~cytosol,GO:0005913~cell-cell adherens junction,GO:0005925~focal adhesion,GO:0016234~inclusion body,GO:0048471~perinuclear region of cytoplasm,GO:0072562~blood microparticle,	GO:0001618~virus receptor activity,GO:0001664~G-protein coupled receptor binding,GO:0005102~receptor binding,GO:0005515~protein binding,GO:0005524~ATP binding,GO:0016887~ATPase activity,GO:0019899~enzyme binding,GO:0031072~heat shock protein binding,GO:0031625~ubiquitin protein ligase binding,GO:0042623~ATPase activity, coupled,GO:0042826~histone deacetylase binding,GO:0044183~protein binding inv…	IPR013126:Heat shock protein 70 family,IPR018181:Heat shock protein 70, conserved site,	hsa03040:Spliceosome,hsa04010:MAPK signaling pathway,hsa04141:Protein processing in endoplasmic reticulum,hsa04144:Endocytosis,hsa04612:Antigen processing and presentation,hsa04915:Estrogen signaling pathway,hsa05134:Legionellosis,hsa05145:Toxoplasmosis,hsa05162:Measles,hsa05164:Influenza A,				3D-structure,Acetylation,Alternative splicing,ATP-binding,Chaperone,Coiled coil,Complete proteome,Cytoplasm,Direct protein sequencing,Host cell receptor for virus entry,Methylation,Nucleotide-binding,Phosphoprotein,Polymorphism,Receptor,Reference proteome,Stress response,	chain:Heat shock 70 kDa protein 1A/1B,helix,modified residue,sequence conflict,sequence variant,strand,turn,
HSPA5	heat shock protein family A (Hsp70) member 5(HSPA5)	Homo sapiens		h_prionPathway:Prion Pathway,h_stathminPathway:Stathmin and breast cancer resistance to antimicrotubule agents,		GO:0006983~ER overload response,GO:0006987~activation of signaling protein activity involved in unfolded protein response,GO:0021589~cerebellum structural organization,GO:0021680~cerebellar Purkinje cell layer development,GO:0021762~substantia nigra development,GO:0030335~positive regulation of cell migration,GO:0030433~ER-associated ubiquitin-dependent protein catabolic process,GO:0030512~negati…	GO:0005634~nucleus,GO:0005739~mitochondrion,GO:0005783~endoplasmic reticulum,GO:0005788~endoplasmic reticulum lumen,GO:0005789~endoplasmic reticulum membrane,GO:0005790~smooth endoplasmic reticulum,GO:0005793~endoplasmic reticulum-Golgi intermediate compartment,GO:0005886~plasma membrane,GO:0005913~cell-cell adherens junction,GO:0005925~focal adhesion,GO:0008180~COP9 signalosome,GO:0009986~cell s…	GO:0001948~glycoprotein binding,GO:0005509~calcium ion binding,GO:0005515~protein binding,GO:0005524~ATP binding,GO:0016887~ATPase activity,GO:0019899~enzyme binding,GO:0019904~protein domain specific binding,GO:0031625~ubiquitin protein ligase binding,GO:0043022~ribosome binding,GO:0051082~unfolded protein binding,GO:0051087~chaperone binding,GO:0051787~misfolded protein binding,GO:0098641~cadhe…	IPR013126:Heat shock protein 70 family,IPR018181:Heat shock protein 70, conserved site,	hsa03060:Protein export,hsa04141:Protein processing in endoplasmic reticulum,hsa04918:Thyroid hormone synthesis,hsa05020:Prion diseases,				3D-structure,Acetylation,ATP-binding,Coiled coil,Complete proteome,Cytoplasm,Direct protein sequencing,Endoplasmic reticulum,Isopeptide bond,Methylation,Nitration,Nucleotide-binding,Phosphoprotein,Polymorphism,Reference proteome,Signal,Ubl conjugation,	chain:78 kDa glucose-regulated protein,modified residue,sequence conflict,sequence variant,short sequence motif:Prevents secretion from ER,signal peptide,
IL1A	interleukin 1 alpha(IL1A)	Homo sapiens	110.CRHandLC-NA,114.Genomic_reformatting_Brain_Ischemia,125.T_Cells_CNS-APCs,19.Cytokine_microglia,22.Cytokine-chemokine_CNS,56.Macrophage_regulation_of_CD4+T_cells,58.(CD40L)_immnosurveillance,88.Alternatively_Activated_APC,	h_cytokinePathway:Cytokine Network,h_erythPathway:Erythrocyte Differentiation Pathway,h_granulocytesPathway:Adhesion and Diapedesis of Granulocytes,h_hsp27Pathway:Stress Induction of HSP Regulation,h_il10Pathway:IL-10 Anti-inflammatory Signaling Pathway,h_il1rPathway:Signal transduction through IL1R,h_inflamPathway:Cytokines and Inflammatory Response,h_LairPathway:Cells and Molecules involved in …		GO:0001660~fever generation,GO:0002248~connective tissue replacement involved in inflammatory response wound healing,GO:0006915~apoptotic process,GO:0006954~inflammatory response,GO:0006955~immune response,GO:0008283~cell proliferation,GO:0008285~negative regulation of cell proliferation,GO:0010575~positive regulation of vascular endothelial growth factor production,GO:0010628~positive regulation…	GO:0005576~extracellular region,GO:0005615~extracellular space,GO:0005829~cytosol,	GO:0005125~cytokine activity,GO:0005149~interleukin-1 receptor binding,GO:0005507~copper ion binding,GO:0005515~protein binding,	IPR000975:Interleukin-1,IPR003294:Interleukin-1, alpha/beta,IPR003295:Interleukin-1, alpha IL1A,IPR003502:Interleukin-1 propeptide,IPR008996:Cytokine, IL-1-like,IPR020877:Interleukin-1 conserved site,	hsa04010:MAPK signaling pathway,hsa04060:Cytokine-cytokine receptor interaction,hsa04380:Osteoclast differentiation,hsa04640:Hematopoietic cell lineage,hsa04932:Non-alcoholic fatty liver disease (NAFLD),hsa04940:Type I diabetes mellitus,hsa05020:Prion diseases,hsa05132:Salmonella infection,hsa05133:Pertussis,hsa05140:Leishmaniasis,hsa05152:Tuberculosis,hsa05162:Measles,hsa05164:Influenza A,hsa053…				3D-structure,Complete proteome,Cytokine,Direct protein sequencing,Glycoprotein,Inflammatory response,Lipoprotein,Mitogen,Myristate,Phosphoprotein,Polymorphism,Pyrogen,Reference proteome,Secreted,	chain:Interleukin-1 alpha,glycosylation site:N-linked (GlcNAc...),helix,lipid moiety-binding region:N6-myristoyl lysine,sequence variant,strand,turn,
IL1B	interleukin 1 beta(IL1B)	Homo sapiens		h_il1rPathway:Signal transduction through IL1R,h_il5Pathway:IL 5 Signaling Pathway,h_mspPathway:Msp/Ron Receptor Signaling Pathway,h_nthiPathway:NFkB activation by Nontypeable Hemophilus influenzae,		GO:0000165~MAPK cascade,GO:0000187~activation of MAPK activity,GO:0001660~fever generation,GO:0001934~positive regulation of protein phosphorylation,GO:0002711~positive regulation of T cell mediated immunity,GO:0006915~apoptotic process,GO:0006954~inflammatory response,GO:0006955~immune response,GO:0007165~signal transduction,GO:0007267~cell-cell signaling,GO:0007566~embryo implantation,GO:000828…	GO:0005576~extracellular region,GO:0005615~extracellular space,GO:0005764~lysosome,GO:0005776~autophagosome,GO:0005829~cytosol,GO:0030141~secretory granule,GO:0070062~extracellular exosome,	GO:0005125~cytokine activity,GO:0005149~interleukin-1 receptor binding,GO:0019904~protein domain specific binding,	IPR000975:Interleukin-1,IPR003294:Interleukin-1, alpha/beta,IPR003296:Interleukin-1, beta IL1B,IPR003502:Interleukin-1 propeptide,IPR008996:Cytokine, IL-1-like,IPR020877:Interleukin-1 conserved site,	hsa04010:MAPK signaling pathway,hsa04060:Cytokine-cytokine receptor interaction,hsa04064:NF-kappa B signaling pathway,hsa04380:Osteoclast differentiation,hsa04620:Toll-like receptor signaling pathway,hsa04621:NOD-like receptor signaling pathway,hsa04623:Cytosolic DNA-sensing pathway,hsa04640:Hematopoietic cell lineage,hsa04668:TNF signaling pathway,hsa04750:Inflammatory mediator regulation of TRP…	137215~Gastric cancer risk after H. pylori infection,			3D-structure,Complete proteome,Cytokine,Cytoplasm,Cytoplasmic vesicle,Direct protein sequencing,Inflammatory response,Lysosome,Mitogen,Polymorphism,Proteomics identification,Pyrogen,Reference proteome,Secreted,	chain:Interleukin-1 beta,helix,sequence conflict,site:Involved in receptor binding,strand,turn,
IL6	interleukin 6(IL6)	Homo sapiens	11.IL-6_gp130-Jak-STAT,110.CRHandLC-NA,114.Genomic_reformatting_Brain_Ischemia,12.IL-6_type_cytok-signal-transduct,15.T-cell_polarization-chemokine_receptors,18.Cytokine_astocytes,19.Cytokine_microglia,20.Cytokine_oligodendrocytes,21.Cytokine_neurons,22.Cytokine-chemokine_CNS,56.Macrophage_regulation_of_CD4+T_cells,58.(CD40L)_immnosurveillance,7.IL17_hematopoesis,80.T_cell_Activation,97.Immune_in…	h_cytokinePathway:Cytokine Network,h_erythPathway:Erythrocyte Differentiation Pathway,h_her2Pathway:Role of ERBB2 in Signal Transduction and Oncology,h_il10Pathway:IL-10 Anti-inflammatory Signaling Pathway,h_il17Pathway:IL 17 Signaling Pathway,h_il1rPathway:Signal transduction through IL1R,h_il5Pathway:IL 5 Signaling Pathway,h_il6Pathway:IL 6 signaling pathway,h_inflamPathway:Cytokines and Inflam…		GO:0001781~neutrophil apoptotic process,GO:0001878~response to yeast,GO:0002384~hepatic immune response,GO:0002446~neutrophil mediated immunity,GO:0002526~acute inflammatory response,GO:0002548~monocyte chemotaxis,GO:0002675~positive regulation of acute inflammatory response,GO:0002690~positive regulation of leukocyte chemotaxis,GO:0006469~negative regulation of protein kinase activity,GO:0006953…	GO:0005576~extracellular region,GO:0005615~extracellular space,GO:0005737~cytoplasm,GO:0005896~interleukin-6 receptor complex,GO:0009897~external side of plasma membrane,	GO:0005125~cytokine activity,GO:0005138~interleukin-6 receptor binding,GO:0005515~protein binding,GO:0008083~growth factor activity,	IPR003574:Interleukin-6,IPR009079:Four-helical cytokine-like, core,IPR012351:Four-helical cytokine, core,	hsa04060:Cytokine-cytokine receptor interaction,hsa04066:HIF-1 signaling pathway,hsa04068:FoxO signaling pathway,hsa04151:PI3K-Akt signaling pathway,hsa04620:Toll-like receptor signaling pathway,hsa04621:NOD-like receptor signaling pathway,hsa04623:Cytosolic DNA-sensing pathway,hsa04630:Jak-STAT signaling pathway,hsa04640:Hematopoietic cell lineage,hsa04668:TNF signaling pathway,hsa04672:Intestin…	108010~Intracranial hemorrhage in brain cerebrovascular malformations, susceptibility to,125853~Diabetes, susceptibility to, 222100,148000~Kaposi sarcoma, susceptibility to,266600~Crohn disease-associated growth failure,604302~Rheumatoid arthritis, systemic juvenile,	PIRSF001935:interleukin-6,	SM00126:IL6,	3D-structure,Acute phase,Complete proteome,Cytokine,Direct protein sequencing,Disulfide bond,Glycoprotein,Growth factor,Phosphoprotein,Polymorphism,Proteomics identification,Reference proteome,Secreted,Signal,	chain:Interleukin-6,disulfide bond,glycosylation site:N-linked (GlcNAc...),helix,mutagenesis site,sequence variant,signal peptide,strand,
LAMC1	laminin subunit gamma 1(LAMC1)	Homo sapiens		h_prionPathway:Prion Pathway,	DNA replication, recombination, and repair,	GO:0006461~protein complex assembly,GO:0007155~cell adhesion,GO:0007492~endoderm development,GO:0016477~cell migration,GO:0022617~extracellular matrix disassembly,GO:0030198~extracellular matrix organization,GO:0031581~hemidesmosome assembly,GO:0034446~substrate adhesion-dependent cell spreading,GO:0050679~positive regulation of epithelial cell proliferation,	GO:0005576~extracellular region,GO:0005604~basement membrane,GO:0005606~laminin-1 complex,GO:0005615~extracellular space,GO:0031012~extracellular matrix,GO:0043259~laminin-10 complex,GO:0043260~laminin-11 complex,GO:0070062~extracellular exosome,	GO:0005201~extracellular matrix structural constituent,	IPR000034:Laminin B type IV,IPR000742:Epidermal growth factor-like domain,IPR002049:EGF-like, laminin,IPR008211:Laminin, N-terminal,IPR008979:Galactose-binding domain-like,	hsa04151:PI3K-Akt signaling pathway,hsa04510:Focal adhesion,hsa04512:ECM-receptor interaction,hsa05020:Prion diseases,hsa05145:Toxoplasmosis,hsa05146:Amoebiasis,hsa05200:Pathways in cancer,hsa05222:Small cell lung cancer,			SM00136:LamNT,SM00180:EGF_Lam,SM00181:EGF,SM00281:LamB,	Basement membrane,Cell adhesion,Coiled coil,Complete proteome,Disulfide bond,Extracellular matrix,Glycoprotein,Laminin EGF-like domain,Phosphoprotein,Polymorphism,Proteomics identification,Reference proteome,Repeat,Secreted,Signal,	chain:Laminin subunit gamma-1,disulfide bond,domain:Laminin EGF-like 1,domain:Laminin EGF-like 10,domain:Laminin EGF-like 11,domain:Laminin EGF-like 2,domain:Laminin EGF-like 3,domain:Laminin EGF-like 4,domain:Laminin EGF-like 5; first part,domain:Laminin EGF-like 5; second part,domain:Laminin EGF-like 6,domain:Laminin EGF-like 7,domain:Laminin EGF-like 8,domain:Laminin EGF-like 9,domain:Laminin …
MAP2K1	mitogen-activated protein kinase kinase 1(MAP2K1)	Homo sapiens	100.MAPK_signaling_cascades,67.Ikaros_and_signaling_inhibitors,	h_AnthraxPathway:Anthrax Toxin Mechanism of Action,h_at1rPathway:Angiotensin II mediated activation of JNK Pathway via Pyk2 dependent signaling,h_bArr-mapkPathway:Role of ├»┬┐┬¢-arrestins in the activation and targeting of MAP kinases,h_bArrestin-srcPathway:Roles of ├»┬┐┬¢-arrestin-dependent Recruitment of Src Kinases in GPCR Signaling,h_bcrPathway:BCR Signaling Pathway,h_biopeptidesPathway:Bioac…		GO:0000165~MAPK cascade,GO:0000187~activation of MAPK activity,GO:0006928~movement of cell or subcellular component,GO:0006935~chemotaxis,GO:0007050~cell cycle arrest,GO:0007165~signal transduction,GO:0007507~heart development,GO:0008285~negative regulation of cell proliferation,GO:0010628~positive regulation of gene expression,GO:0010629~negative regulation of gene expression,GO:0018108~peptidyl…	GO:0005634~nucleus,GO:0005737~cytoplasm,GO:0005739~mitochondrion,GO:0005769~early endosome,GO:0005770~late endosome,GO:0005783~endoplasmic reticulum,GO:0005794~Golgi apparatus,GO:0005815~microtubule organizing center,GO:0005816~spindle pole body,GO:0005829~cytosol,GO:0005886~plasma membrane,GO:0005925~focal adhesion,GO:0070062~extracellular exosome,	GO:0004672~protein kinase activity,GO:0004674~protein serine/threonine kinase activity,GO:0004702~receptor signaling protein serine/threonine kinase activity,GO:0004708~MAP kinase kinase activity,GO:0004712~protein serine/threonine/tyrosine kinase activity,GO:0004713~protein tyrosine kinase activity,GO:0004728~receptor signaling protein tyrosine phosphatase activity,GO:0005515~protein binding,GO:…	IPR000719:Protein kinase, catalytic domain,IPR008271:Serine/threonine-protein kinase, active site,IPR011009:Protein kinase-like domain,IPR017441:Protein kinase, ATP binding site,	hsa04010:MAPK signaling pathway,hsa04012:ErbB signaling pathway,hsa04014:Ras signaling pathway,hsa04015:Rap1 signaling pathway,hsa04022:cGMP-PKG signaling pathway,hsa04024:cAMP signaling pathway,hsa04062:Chemokine signaling pathway,hsa04066:HIF-1 signaling pathway,hsa04068:FoxO signaling pathway,hsa04071:Sphingolipid signaling pathway,hsa04114:Oocyte meiosis,hsa04151:PI3K-Akt signaling pathway,hs…	615279~Cardiofaciocutaneous syndrome 3,		SM00220:S_TKc,	3D-structure,Acetylation,Alternative splicing,ATP-binding,Cardiomyopathy,Coiled coil,Complete proteome,Cytoplasm,Cytoskeleton,Direct protein sequencing,Disease mutation,Ectodermal dysplasia,Kinase,Membrane,Mental retardation,Nucleotide-binding,Nucleus,Phosphoprotein,Proteomics identification,Reference proteome,Serine/threonine-protein kinase,Transferase,Tyrosine-protein kinase,	active site:Proton acceptor,binding site:ATP,chain:Dual specificity mitogen-activated protein kinase kinase 1,compositionally biased region:Pro-rich,domain:Protein kinase,helix,modified residue,mutagenesis site,nucleotide phosphate-binding region:ATP,sequence variant,site:Cleavage; by anthrax lethal factor,strand,turn,
MAP2K2	mitogen-activated protein kinase kinase 2(MAP2K2)	Homo sapiens	100.MAPK_signaling_cascades,	h_AnthraxPathway:Anthrax Toxin Mechanism of Action,h_at1rPathway:Angiotensin II mediated activation of JNK Pathway via Pyk2 dependent signaling,h_bArr-mapkPathway:Role of ├»┬┐┬¢-arrestins in the activation and targeting of MAP kinases,h_bArrestin-srcPathway:Roles of ├»┬┐┬¢-arrestin-dependent Recruitment of Src Kinases in GPCR Signaling,h_biopeptidesPathway:Bioactive Peptide Induced Signaling Path…		GO:0000165~MAPK cascade,GO:0000187~activation of MAPK activity,GO:0010629~negative regulation of gene expression,GO:0018108~peptidyl-tyrosine phosphorylation,GO:0032872~regulation of stress-activated MAPK cascade,GO:0035897~proteolysis in other organism,GO:0036289~peptidyl-serine autophosphorylation,GO:0045893~positive regulation of transcription, DNA-templated,GO:0070371~ERK1 and ERK2 cascade,GO…	GO:0005576~extracellular region,GO:0005634~nucleus,GO:0005737~cytoplasm,GO:0005739~mitochondrion,GO:0005769~early endosome,GO:0005770~late endosome,GO:0005778~peroxisomal membrane,GO:0005783~endoplasmic reticulum,GO:0005794~Golgi apparatus,GO:0005829~cytosol,GO:0005874~microtubule,GO:0005911~cell-cell junction,GO:0005925~focal adhesion,GO:0009898~cytoplasmic side of plasma membrane,GO:0048471~per…	GO:0004672~protein kinase activity,GO:0004674~protein serine/threonine kinase activity,GO:0004702~receptor signaling protein serine/threonine kinase activity,GO:0004708~MAP kinase kinase activity,GO:0004712~protein serine/threonine/tyrosine kinase activity,GO:0004713~protein tyrosine kinase activity,GO:0005515~protein binding,GO:0005524~ATP binding,GO:0030165~PDZ domain binding,GO:0043539~protein…	IPR000719:Protein kinase, catalytic domain,IPR008271:Serine/threonine-protein kinase, active site,IPR011009:Protein kinase-like domain,IPR017441:Protein kinase, ATP binding site,	hsa04010:MAPK signaling pathway,hsa04012:ErbB signaling pathway,hsa04014:Ras signaling pathway,hsa04015:Rap1 signaling pathway,hsa04022:cGMP-PKG signaling pathway,hsa04024:cAMP signaling pathway,hsa04066:HIF-1 signaling pathway,hsa04068:FoxO signaling pathway,hsa04071:Sphingolipid signaling pathway,hsa04151:PI3K-Akt signaling pathway,hsa04270:Vascular smooth muscle contraction,hsa04370:VEGF signa…	615280~Cardiofaciocutaneous syndrome 4,		SM00220:S_TKc,	3D-structure,Acetylation,ATP-binding,Cardiomyopathy,Complete proteome,Cytoplasm,Direct protein sequencing,Disease mutation,Ectodermal dysplasia,Kinase,Magnesium,Membrane,Mental retardation,Metal-binding,Nucleotide-binding,Phosphoprotein,Proteomics identification,Reference proteome,Serine/threonine-protein kinase,Transferase,Tyrosine-protein kinase,	active site:Proton acceptor,binding site:ATP,chain:Dual specificity mitogen-activated protein kinase kinase 2,compositionally biased region:Pro-rich,domain:Protein kinase,helix,modified residue,nucleotide phosphate-binding region:ATP,sequence variant,site:Cleavage; by anthrax lethal factor,strand,turn,
MAPK1	mitogen-activated protein kinase 1(MAPK1)	Homo sapiens	100.MAPK_signaling_cascades,104.Insulin_signaling,105.Signaling_glucose_uptake,106.Glycogen_synthase-synthesis,107.mRNA_translation-protein_synthesis,2.Cytokine_Receptors,37.Akt-PKB_Effector_of_P13K_in_Vivo,54.T-cell_anergy,63.LAT_couples_T-cell_receptor,65.Integrin_affinity_modulation,67.Ikaros_and_signaling_inhibitors,68.Mitogen_signaling_in_growth_control,82.TCR_and_Cap_or_SMAC,87.Activation_E…	h_agrPathway:Agrin in Postsynaptic Differentiation,h_arenrf2Pathway:Oxidative Stress Induced Gene Expression Via Nrf2,h_at1rPathway:Angiotensin II mediated activation of JNK Pathway via Pyk2 dependent signaling,h_badPathway:Regulation of BAD phosphorylation,h_bArr-mapkPathway:Role of ├»┬┐┬¢-arrestins in the activation and targeting of MAP kinases,h_bArrestin-srcPathway:Roles of ├»┬┐┬¢-arrestin-de…		GO:0000165~MAPK cascade,GO:0000187~activation of MAPK activity,GO:0000189~MAPK import into nucleus,GO:0006351~transcription, DNA-templated,GO:0006468~protein phosphorylation,GO:0006915~apoptotic process,GO:0006935~chemotaxis,GO:0006950~response to stress,GO:0006974~cellular response to DNA damage stimulus,GO:0007049~cell cycle,GO:0007165~signal transduction,GO:0007268~chemical synaptic transmissi…	GO:0005622~intracellular,GO:0005634~nucleus,GO:0005654~nucleoplasm,GO:0005737~cytoplasm,GO:0005739~mitochondrion,GO:0005769~early endosome,GO:0005770~late endosome,GO:0005794~Golgi apparatus,GO:0005815~microtubule organizing center,GO:0005829~cytosol,GO:0005856~cytoskeleton,GO:0005901~caveola,GO:0005925~focal adhesion,GO:0015630~microtubule cytoskeleton,GO:0030424~axon,GO:0031143~pseudopodium,GO:…	GO:0001784~phosphotyrosine binding,GO:0003677~DNA binding,GO:0004674~protein serine/threonine kinase activity,GO:0004707~MAP kinase activity,GO:0005515~protein binding,GO:0005524~ATP binding,GO:0008134~transcription factor binding,GO:0008353~RNA polymerase II carboxy-terminal domain kinase activity,GO:0016301~kinase activity,GO:0019902~phosphatase binding,GO:0031435~mitogen-activated protein kina…	IPR000719:Protein kinase, catalytic domain,IPR003527:Mitogen-activated protein (MAP) kinase, conserved site,IPR008271:Serine/threonine-protein kinase, active site,IPR008349:Mitogen-activated protein (MAP) kinase, ERK1/2,IPR011009:Protein kinase-like domain,IPR017441:Protein kinase, ATP binding site,	hsa04010:MAPK signaling pathway,hsa04012:ErbB signaling pathway,hsa04014:Ras signaling pathway,hsa04015:Rap1 signaling pathway,hsa04022:cGMP-PKG signaling pathway,hsa04024:cAMP signaling pathway,hsa04062:Chemokine signaling pathway,hsa04066:HIF-1 signaling pathway,hsa04068:FoxO signaling pathway,hsa04071:Sphingolipid signaling pathway,hsa04114:Oocyte meiosis,hsa04150:mTOR signaling pathway,hsa041…			SM00220:S_TKc,	3D-structure,Acetylation,Alternative splicing,Apoptosis,ATP-binding,Cell cycle,Complete proteome,Cytoplasm,Cytoskeleton,Direct protein sequencing,DNA-binding,Host-virus interaction,Kinase,Magnesium,Nucleotide-binding,Nucleus,Phosphoprotein,Reference proteome,Repressor,Serine/threonine-protein kinase,Transcription,Transcription regulation,Transferase,Ubl conjugation,	active site:Proton acceptor,binding site:ATP,chain:Mitogen-activated protein kinase 1,compositionally biased region:Poly-Ala,domain:Protein kinase,helix,modified residue,nucleotide phosphate-binding region:ATP,sequence conflict,short sequence motif:TXY,strand,turn,
MAPK3	mitogen-activated protein kinase 3(MAPK3)	Homo sapiens	100.MAPK_signaling_cascades,54.T-cell_anergy,	h_agrPathway:Agrin in Postsynaptic Differentiation,h_at1rPathway:Angiotensin II mediated activation of JNK Pathway via Pyk2 dependent signaling,h_badPathway:Regulation of BAD phosphorylation,h_bArr-mapkPathway:Role of ├»┬┐┬¢-arrestins in the activation and targeting of MAP kinases,h_bArrestin-srcPathway:Roles of ├»┬┐┬¢-arrestin-dependent Recruitment of Src Kinases in GPCR Signaling,h_bcrPathway:B…		GO:0000165~MAPK cascade,GO:0000187~activation of MAPK activity,GO:0000189~MAPK import into nucleus,GO:0001934~positive regulation of protein phosphorylation,GO:0006351~transcription, DNA-templated,GO:0006361~transcription initiation from RNA polymerase I promoter,GO:0006461~protein complex assembly,GO:0006468~protein phosphorylation,GO:0006915~apoptotic process,GO:0006974~cellular response to DNA…	GO:0005622~intracellular,GO:0005634~nucleus,GO:0005635~nuclear envelope,GO:0005654~nucleoplasm,GO:0005739~mitochondrion,GO:0005769~early endosome,GO:0005770~late endosome,GO:0005794~Golgi apparatus,GO:0005829~cytosol,GO:0005856~cytoskeleton,GO:0005901~caveola,GO:0005925~focal adhesion,GO:0015630~microtubule cytoskeleton,GO:0031143~pseudopodium,GO:0043234~protein complex,GO:0070062~extracellular e…	GO:0001784~phosphotyrosine binding,GO:0004674~protein serine/threonine kinase activity,GO:0004707~MAP kinase activity,GO:0005515~protein binding,GO:0005524~ATP binding,GO:0016301~kinase activity,GO:0019902~phosphatase binding,GO:0097110~scaffold protein binding,	IPR000719:Protein kinase, catalytic domain,IPR003527:Mitogen-activated protein (MAP) kinase, conserved site,IPR008271:Serine/threonine-protein kinase, active site,IPR008349:Mitogen-activated protein (MAP) kinase, ERK1/2,IPR011009:Protein kinase-like domain,IPR017441:Protein kinase, ATP binding site,	hsa04010:MAPK signaling pathway,hsa04012:ErbB signaling pathway,hsa04014:Ras signaling pathway,hsa04015:Rap1 signaling pathway,hsa04022:cGMP-PKG signaling pathway,hsa04024:cAMP signaling pathway,hsa04062:Chemokine signaling pathway,hsa04066:HIF-1 signaling pathway,hsa04068:FoxO signaling pathway,hsa04071:Sphingolipid signaling pathway,hsa04114:Oocyte meiosis,hsa04150:mTOR signaling pathway,hsa041…			SM00220:S_TKc,	3D-structure,Acetylation,Alternative splicing,Apoptosis,ATP-binding,Cell cycle,Complete proteome,Cytoplasm,Direct protein sequencing,Host-virus interaction,Kinase,Magnesium,Nucleotide-binding,Nucleus,Phosphoprotein,Polymorphism,Proteomics identification,Reference proteome,Serine/threonine-protein kinase,Transferase,	active site:Proton acceptor,binding site:ATP,chain:Mitogen-activated protein kinase 3,domain:Protein kinase,helix,modified residue,nucleotide phosphate-binding region:ATP,sequence conflict,sequence variant,short sequence motif:TXY,strand,turn,
NCAM1	neural cell adhesion molecule 1(NCAM1)	Homo sapiens		h_PDZsPathway:Synaptic Proteins at the Synaptic Junction,		GO:0000165~MAPK cascade,GO:0007155~cell adhesion,GO:0007411~axon guidance,GO:0031175~neuron projection development,GO:0043547~positive regulation of GTPase activity,GO:0046718~viral entry into host cell,GO:0048167~regulation of synaptic plasticity,GO:0060333~interferon-gamma-mediated signaling pathway,	GO:0000139~Golgi membrane,GO:0005737~cytoplasm,GO:0005886~plasma membrane,GO:0009897~external side of plasma membrane,GO:0009986~cell surface,GO:0016020~membrane,GO:0016021~integral component of membrane,GO:0031225~anchored component of membrane,GO:0070062~extracellular exosome,	GO:0001618~virus receptor activity,GO:0005088~Ras guanyl-nucleotide exchange factor activity,	IPR003598:Immunoglobulin subtype 2,IPR003599:Immunoglobulin subtype,IPR003961:Fibronectin, type III,IPR007110:Immunoglobulin-like domain,IPR009138:Neural cell adhesion,IPR013098:Immunoglobulin I-set,IPR013783:Immunoglobulin-like fold,	hsa04514:Cell adhesion molecules (CAMs),hsa05020:Prion diseases,			SM00060:FN3,SM00408:IGc2,SM00409:IG,	3D-structure,Alternative splicing,Cell adhesion,Cell membrane,Complete proteome,Disulfide bond,Glycoprotein,GPI-anchor,Host cell receptor for virus entry,Host-virus interaction,Immunoglobulin domain,Lipoprotein,Membrane,Phosphoprotein,Polymorphism,Proteomics identification,Receptor,Reference proteome,Repeat,Secreted,Signal,Transmembrane,Transmembrane helix,	chain:Neural cell adhesion molecule 1,disulfide bond,domain:Fibronectin type-III 1,domain:Fibronectin type-III 2,domain:Ig-like C2-type 1,domain:Ig-like C2-type 2,domain:Ig-like C2-type 3,domain:Ig-like C2-type 4,domain:Ig-like C2-type 5,glycosylation site:N-linked (GlcNAc...),helix,modified residue,sequence conflict,sequence variant,signal peptide,splice variant,strand,topological domain:Cytopla…
NCAM2	neural cell adhesion molecule 2(NCAM2)	Homo sapiens				GO:0007155~cell adhesion,GO:0007158~neuron cell-cell adhesion,GO:0007413~axonal fasciculation,GO:0007608~sensory perception of smell,	GO:0005886~plasma membrane,GO:0016021~integral component of membrane,GO:0030424~axon,		IPR003598:Immunoglobulin subtype 2,IPR003599:Immunoglobulin subtype,IPR003961:Fibronectin, type III,IPR007110:Immunoglobulin-like domain,IPR009138:Neural cell adhesion,IPR013098:Immunoglobulin I-set,IPR013106:Immunoglobulin V-set,IPR013783:Immunoglobulin-like fold,	hsa04514:Cell adhesion molecules (CAMs),hsa05020:Prion diseases,			SM00060:FN3,SM00406:IGv,SM00408:IGc2,SM00409:IG,	3D-structure,Alternative splicing,Cell adhesion,Cell membrane,Complete proteome,Disulfide bond,Glycoprotein,Immunoglobulin domain,Membrane,Phosphoprotein,Polymorphism,Proteomics identification,Reference proteome,Repeat,Signal,Transmembrane,Transmembrane helix,	chain:Neural cell adhesion molecule 2,disulfide bond,domain:Fibronectin type-III 1,domain:Fibronectin type-III 2,domain:Ig-like C2-type 1,domain:Ig-like C2-type 2,domain:Ig-like C2-type 3,domain:Ig-like C2-type 4,domain:Ig-like C2-type 5,glycosylation site:N-linked (GlcNAc...),helix,modified residue,sequence conflict,sequence variant,signal peptide,strand,topological domain:Cytoplasmic,topologica…
NOTCH1	notch 1(NOTCH1)	Homo sapiens		h_hesPathway:Segmentation Clock,h_notchPathway:Proteolysis and Signaling Pathway of Notch ,h_ps1Pathway:Presenilin action in Notch and Wnt signaling,		GO:0000122~negative regulation of transcription from RNA polymerase II promoter,GO:0001701~in utero embryonic development,GO:0001708~cell fate specification,GO:0001837~epithelial to mesenchymal transition,GO:0001889~liver development,GO:0001947~heart looping,GO:0002040~sprouting angiogenesis,GO:0002052~positive regulation of neuroblast proliferation,GO:0002437~inflammatory response to antigenic s…	GO:0000139~Golgi membrane,GO:0001669~acrosomal vesicle,GO:0002193~MAML1-RBP-Jkappa- ICN1 complex,GO:0005576~extracellular region,GO:0005634~nucleus,GO:0005654~nucleoplasm,GO:0005789~endoplasmic reticulum membrane,GO:0005829~cytosol,GO:0005886~plasma membrane,GO:0005912~adherens junction,GO:0009986~cell surface,GO:0016021~integral component of membrane,GO:0016324~apical plasma membrane,GO:0043235~…	GO:0001047~core promoter binding,GO:0001190~transcriptional activator activity, RNA polymerase II transcription factor binding,GO:0003700~transcription factor activity, sequence-specific DNA binding,GO:0004857~enzyme inhibitor activity,GO:0004872~receptor activity,GO:0005112~Notch binding,GO:0005509~calcium ion binding,GO:0005515~protein binding,GO:0019899~enzyme binding,GO:0031490~chromatin DNA …	IPR000152:EGF-type aspartate/asparagine hydroxylation site,IPR000742:Epidermal growth factor-like domain,IPR000800:Notch domain,IPR001881:EGF-like calcium-binding,IPR002110:Ankyrin repeat,IPR008297:Notch,IPR009030:Insulin-like growth factor binding protein, N-terminal,IPR010660:Notch, NOD domain,IPR011656:Notch, NODP domain,IPR013032:EGF-like, conserved site,IPR018097:EGF-like calcium-binding, co…	hsa04320:Dorso-ventral axis formation,hsa04330:Notch signaling pathway,hsa04919:Thyroid hormone signaling pathway,hsa05020:Prion diseases,hsa05206:MicroRNAs in cancer,	109730~Aortic valve disease 1,616028~Adams-Oliver syndrome 5,	PIRSF002279:notch protein,	SM00004:NL,SM00179:EGF_CA,SM00181:EGF,SM00248:ANK,SM01334:SM01334,SM01338:SM01338,SM01339:SM01339,	3D-structure,Activator,Angiogenesis,ANK repeat,Calcium,Cell membrane,Complete proteome,Developmental protein,Differentiation,Direct protein sequencing,Disease mutation,Disulfide bond,EGF-like domain,Glycoprotein,Hydroxylation,Isopeptide bond,Membrane,Metal-binding,Notch signaling pathway,Nucleus,Phosphoprotein,Polymorphism,Receptor,Reference proteome,Repeat,Signal,Transcription,Transcription regu…	chain:Neurogenic locus notch homolog protein 1,chain:Notch 1 extracellular truncation,chain:Notch 1 intracellular domain,compositionally biased region:Poly-Ala,compositionally biased region:Poly-Arg,compositionally biased region:Poly-Gln,compositionally biased region:Poly-Glu,compositionally biased region:Poly-Gly,compositionally biased region:Poly-Pro,compositionally biased region:Poly-Ser,compo…
PRKACA	protein kinase cAMP-activated catalytic subunit alpha(PRKACA)	Homo sapiens		h_gsPathway:Activation of cAMP-dependent protein kinase, PKA,		GO:0000086~G2/M transition of mitotic cell cycle,GO:0001707~mesoderm formation,GO:0001843~neural tube closure,GO:0002027~regulation of heart rate,GO:0002223~stimulatory C-type lectin receptor signaling pathway,GO:0003091~renal water homeostasis,GO:0006397~mRNA processing,GO:0006468~protein phosphorylation,GO:0007596~blood coagulation,GO:0010881~regulation of cardiac muscle contraction by regulati…	GO:0001669~acrosomal vesicle,GO:0005634~nucleus,GO:0005654~nucleoplasm,GO:0005739~mitochondrion,GO:0005813~centrosome,GO:0005829~cytosol,GO:0005886~plasma membrane,GO:0005952~cAMP-dependent protein kinase complex,GO:0016020~membrane,GO:0016607~nuclear speck,GO:0031514~motile cilium,GO:0031588~nucleotide-activated protein kinase complex,GO:0031594~neuromuscular junction,GO:0034704~calcium channel …	GO:0004674~protein serine/threonine kinase activity,GO:0004691~cAMP-dependent protein kinase activity,GO:0004712~protein serine/threonine/tyrosine kinase activity,GO:0005515~protein binding,GO:0005524~ATP binding,GO:0019901~protein kinase binding,GO:0031625~ubiquitin protein ligase binding,GO:0034237~protein kinase A regulatory subunit binding,	IPR000719:Protein kinase, catalytic domain,IPR000961:AGC-kinase, C-terminal,IPR008271:Serine/threonine-protein kinase, active site,IPR011009:Protein kinase-like domain,IPR017441:Protein kinase, ATP binding site,	hsa04010:MAPK signaling pathway,hsa04014:Ras signaling pathway,hsa04020:Calcium signaling pathway,hsa04024:cAMP signaling pathway,hsa04062:Chemokine signaling pathway,hsa04114:Oocyte meiosis,hsa04261:Adrenergic signaling in cardiomyocytes,hsa04270:Vascular smooth muscle contraction,hsa04310:Wnt signaling pathway,hsa04340:Hedgehog signaling pathway,hsa04540:Gap junction,hsa04611:Platelet activatio…	615830~Cushing syndrome, ACTH-independent adrenal, somatic,		SM00133:S_TK_X,SM00220:S_TKc,	3D-structure,Alternative splicing,ATP-binding,cAMP,Cell membrane,Cell projection,Cilium,Complete proteome,Cushing syndrome,Cytoplasm,Disease mutation,Flagellum,Kinase,Lipoprotein,Membrane,Mitochondrion,Myristate,Nucleotide-binding,Nucleus,Phosphoprotein,Polymorphism,Proteomics identification,Reference proteome,Serine/threonine-protein kinase,Transferase,	active site:Proton acceptor,binding site:ATP,chain:cAMP-dependent protein kinase catalytic subunit alpha,domain:AGC-kinase C-terminal,domain:Protein kinase,helix,lipid moiety-binding region:N-myristoyl glycine,modified residue,nucleotide phosphate-binding region:ATP,sequence variant,splice variant,strand,turn,
PRKACB	protein kinase cAMP-activated catalytic subunit beta(PRKACB)	Homo sapiens		h_agpcrPathway:Attenuation of GPCR Signaling,h_akap13Pathway:Rho-Selective Guanine Exchange Factor AKAP13 Mediates Stress Fiber Formation,h_akap95Pathway:AKAP95 role in mitosis and chromosome dynamics,h_akapcentrosomePathway:Protein Kinase A at the Centrosome,h_badPathway:Regulation of BAD phosphorylation,h_carm1Pathway:Transcription Regulation by Methyltransferase of CARM1,h_cftrPathway:Cystic f…		GO:0001843~neural tube closure,GO:0002223~stimulatory C-type lectin receptor signaling pathway,GO:0003091~renal water homeostasis,GO:0006468~protein phosphorylation,GO:0007165~signal transduction,GO:0007188~adenylate cyclase-modulating G-protein coupled receptor signaling pathway,GO:0007596~blood coagulation,GO:0034199~activation of protein kinase A activity,GO:0042157~lipoprotein metabolic proce…	GO:0005654~nucleoplasm,GO:0005813~centrosome,GO:0005829~cytosol,GO:0005886~plasma membrane,GO:0005952~cAMP-dependent protein kinase complex,GO:0048471~perinuclear region of cytoplasm,GO:0070062~extracellular exosome,GO:0097546~ciliary base,	GO:0000287~magnesium ion binding,GO:0004674~protein serine/threonine kinase activity,GO:0004691~cAMP-dependent protein kinase activity,GO:0005515~protein binding,GO:0005524~ATP binding,GO:0016301~kinase activity,GO:0031625~ubiquitin protein ligase binding,	IPR000719:Protein kinase, catalytic domain,IPR000961:AGC-kinase, C-terminal,IPR008271:Serine/threonine-protein kinase, active site,IPR011009:Protein kinase-like domain,IPR017441:Protein kinase, ATP binding site,	hsa04010:MAPK signaling pathway,hsa04014:Ras signaling pathway,hsa04020:Calcium signaling pathway,hsa04024:cAMP signaling pathway,hsa04062:Chemokine signaling pathway,hsa04114:Oocyte meiosis,hsa04261:Adrenergic signaling in cardiomyocytes,hsa04270:Vascular smooth muscle contraction,hsa04310:Wnt signaling pathway,hsa04340:Hedgehog signaling pathway,hsa04540:Gap junction,hsa04611:Platelet activatio…			SM00133:S_TK_X,SM00220:S_TKc,	Alternative splicing,ATP-binding,cAMP,Cell membrane,Complete proteome,Cytoplasm,Kinase,Lipoprotein,Membrane,Myristate,Nucleotide-binding,Nucleus,Phosphoprotein,Polymorphism,Proteomics identification,Reference proteome,Serine/threonine-protein kinase,Transferase,	active site:Proton acceptor,binding site:ATP,chain:cAMP-dependent protein kinase catalytic subunit beta,domain:AGC-kinase C-terminal,domain:Protein kinase,lipid moiety-binding region:N-myristoyl glycine,modified residue,nucleotide phosphate-binding region:ATP,sequence conflict,sequence variant,splice variant,
PRKACG	protein kinase cAMP-activated catalytic subunit gamma(PRKACG)	Homo sapiens		h_agpcrPathway:Attenuation of GPCR Signaling,h_akap13Pathway:Rho-Selective Guanine Exchange Factor AKAP13 Mediates Stress Fiber Formation,h_akap95Pathway:AKAP95 role in mitosis and chromosome dynamics,h_akapcentrosomePathway:Protein Kinase A at the Centrosome,h_badPathway:Regulation of BAD phosphorylation,h_carm1Pathway:Transcription Regulation by Methyltransferase of CARM1,h_cftrPathway:Cystic f…		GO:0002223~stimulatory C-type lectin receptor signaling pathway,GO:0003091~renal water homeostasis,GO:0006468~protein phosphorylation,GO:0007283~spermatogenesis,GO:0007596~blood coagulation,GO:0008584~male gonad development,GO:0034199~activation of protein kinase A activity,GO:0042157~lipoprotein metabolic process,GO:0071377~cellular response to glucagon stimulus,	GO:0005654~nucleoplasm,GO:0005829~cytosol,GO:0097546~ciliary base,	GO:0004674~protein serine/threonine kinase activity,GO:0004691~cAMP-dependent protein kinase activity,GO:0005524~ATP binding,	IPR000719:Protein kinase, catalytic domain,IPR000961:AGC-kinase, C-terminal,IPR008271:Serine/threonine-protein kinase, active site,IPR011009:Protein kinase-like domain,IPR017441:Protein kinase, ATP binding site,	hsa04010:MAPK signaling pathway,hsa04014:Ras signaling pathway,hsa04020:Calcium signaling pathway,hsa04024:cAMP signaling pathway,hsa04062:Chemokine signaling pathway,hsa04114:Oocyte meiosis,hsa04261:Adrenergic signaling in cardiomyocytes,hsa04270:Vascular smooth muscle contraction,hsa04310:Wnt signaling pathway,hsa04340:Hedgehog signaling pathway,hsa04540:Gap junction,hsa04611:Platelet activatio…	616176~Bleeding disorder, platelet-type, 19,		SM00133:S_TK_X,SM00220:S_TKc,	ATP-binding,cAMP,Complete proteome,Disease mutation,Kinase,Lipoprotein,Myristate,Nucleotide-binding,Phosphoprotein,Polymorphism,Reference proteome,Serine/threonine-protein kinase,Transferase,	active site:Proton acceptor,binding site:ATP,chain:cAMP-dependent protein kinase catalytic subunit gamma,domain:AGC-kinase C-terminal,domain:Protein kinase,lipid moiety-binding region:N-myristoyl glycine,modified residue,nucleotide phosphate-binding region:ATP,sequence conflict,sequence variant,
PRNP	prion protein(PRNP)	Homo sapiens		h_prionPathway:Prion Pathway,		GO:0001933~negative regulation of protein phosphorylation,GO:0006878~cellular copper ion homeostasis,GO:0006979~response to oxidative stress,GO:0007050~cell cycle arrest,GO:0007611~learning or memory,GO:0008152~metabolic process,GO:0032689~negative regulation of interferon-gamma production,GO:0032700~negative regulation of interleukin-17 production,GO:0032703~negative regulation of interleukin-2 …	GO:0005634~nucleus,GO:0005737~cytoplasm,GO:0005739~mitochondrion,GO:0005741~mitochondrial outer membrane,GO:0005783~endoplasmic reticulum,GO:0005794~Golgi apparatus,GO:0005886~plasma membrane,GO:0009986~cell surface,GO:0016021~integral component of membrane,GO:0019898~extrinsic component of membrane,GO:0031225~anchored component of membrane,GO:0045121~membrane raft,GO:0070062~extracellular exosom…	GO:0005507~copper ion binding,GO:0005515~protein binding,GO:0005521~lamin binding,GO:0008017~microtubule binding,GO:0015631~tubulin binding,GO:0042802~identical protein binding,GO:0043008~ATP-dependent protein binding,GO:0044325~ion channel binding,GO:0046872~metal ion binding,GO:0051087~chaperone binding,	IPR000817:Prion protein,IPR020949:Prion, copper binding octapeptide repeat,IPR022416:Prion/Doppel protein, beta-ribbon domain,IPR025860:Major prion protein N-terminal domain,	hsa05020:Prion diseases,	123400~Creutzfeldt-Jakob disease,137440~Cerebral amyloid angiopathy, PRNP-related,137440~Gerstmann-Straussler disease,245300~Kuru, susceptibility to,600072~Insomnia, fatal familial,603218~Huntington disease-like 1,606688~Prion disease with protracted course,		SM00157:PRP,	3D-structure,Alternative initiation,Amyloid,Amyloidosis,Cell cycle,Cell membrane,Complete proteome,Copper,Cytoplasm,Direct protein sequencing,Disease mutation,Disulfide bond,Glycoprotein,Golgi apparatus,GPI-anchor,Growth arrest,Lipoprotein,Membrane,Metal-binding,Mitochondrion,Mitochondrion outer membrane,Nucleus,Polymorphism,Prion,Proteomics identification,Reference proteome,Repeat,Signal,Transme…	chain:Major prion protein,disulfide bond,glycosylation site:N-linked (GlcNAc...),helix,lipid moiety-binding region:GPI-anchor amidated serine,propeptide:Removed in mature form,region of interest:5 X 8 AA tandem repeats of P-H-G-G-G-W-G- Q,region of interest:Interaction with GRB2, ERI3 and SYN1,repeat:1,repeat:2,repeat:3,repeat:4,repeat:5,sequence conflict,sequence variant,signal peptide,strand,tu…
SOD1	superoxide dismutase 1, soluble(SOD1)	Homo sapiens	6.CD23_engagement,	h_FlumazenilPathway:Cardiac Protection Against ROS ,h_freePathway:Free Radical Induced Apoptosis,h_longevityPathway:The IGF-1 Receptor and Longevity,		GO:0000187~activation of MAPK activity,GO:0000302~response to reactive oxygen species,GO:0000303~response to superoxide,GO:0001541~ovarian follicle development,GO:0001819~positive regulation of cytokine production,GO:0001890~placenta development,GO:0001895~retina homeostasis,GO:0001975~response to amphetamine,GO:0002262~myeloid cell homeostasis,GO:0002576~platelet degranulation,GO:0006749~glutath…	GO:0005576~extracellular region,GO:0005615~extracellular space,GO:0005634~nucleus,GO:0005654~nucleoplasm,GO:0005737~cytoplasm,GO:0005739~mitochondrion,GO:0005758~mitochondrial intermembrane space,GO:0005759~mitochondrial matrix,GO:0005764~lysosome,GO:0005777~peroxisome,GO:0005829~cytosol,GO:0005886~plasma membrane,GO:0031012~extracellular matrix,GO:0031045~dense core granule,GO:0031410~cytoplasmi…	GO:0004784~superoxide dismutase activity,GO:0005507~copper ion binding,GO:0005515~protein binding,GO:0008270~zinc ion binding,GO:0030346~protein phosphatase 2B binding,GO:0042802~identical protein binding,GO:0042803~protein homodimerization activity,GO:0046872~metal ion binding,GO:0048365~Rac GTPase binding,GO:0051087~chaperone binding,	IPR001424:Superoxide dismutase, copper/zinc binding domain,IPR018152:Superoxide dismutase, copper/zinc, binding site,IPR024134:Superoxide dismutase (Cu/Zn) / chaperones,	hsa04146:Peroxisome,hsa05014:Amyotrophic lateral sclerosis (ALS),hsa05016:Huntington's disease,hsa05020:Prion diseases,	105400~Amyotrophic lateral sclerosis 1,			3D-structure,Acetylation,Amyotrophic lateral sclerosis,Antioxidant,Complete proteome,Copper,Cytoplasm,Direct protein sequencing,Disease mutation,Disulfide bond,Lipoprotein,Metal-binding,Mitochondrion,Neurodegeneration,Nucleus,Oxidoreductase,Palmitate,Phosphoprotein,Proteomics identification,Reference proteome,Ubl conjugation,Zinc,	chain:Superoxide dismutase [Cu-Zn],disulfide bond,helix,metal ion-binding site:Copper; catalytic,metal ion-binding site:Zinc; structural,modified residue,mutagenesis site,sequence conflict,sequence variant,strand,
STIP1	stress induced phosphoprotein 1(STIP1)	Homo sapiens				GO:0006950~response to stress,	GO:0005634~nucleus,GO:0005794~Golgi apparatus,GO:0043209~myelin sheath,GO:0043234~protein complex,	GO:0005515~protein binding,GO:0008022~protein C-terminus binding,GO:0030544~Hsp70 protein binding,GO:0044822~poly(A) RNA binding,GO:0051087~chaperone binding,	IPR001440:Tetratricopeptide TPR-1,IPR006636:Heat shock chaperonin-binding,IPR011990:Tetratricopeptide-like helical,IPR013026:Tetratricopeptide repeat-containing domain,IPR013105:Tetratricopeptide TPR2,IPR019734:Tetratricopeptide repeat,	hsa05020:Prion diseases,			SM00028:TPR,SM00727:STI1,	3D-structure,Acetylation,Alternative splicing,Complete proteome,Cytoplasm,Direct protein sequencing,Isopeptide bond,Nucleus,Phosphoprotein,Proteomics identification,Reference proteome,Repeat,TPR repeat,Ubl conjugation,	chain:Stress-induced-phosphoprotein 1,domain:STI1 1,domain:STI1 2,helix,modified residue,repeat:TPR 1,repeat:TPR 2,repeat:TPR 3,repeat:TPR 4,repeat:TPR 5,repeat:TPR 6,repeat:TPR 7,repeat:TPR 8,repeat:TPR 9,short sequence motif:Bipartite nuclear localization signal,
